# Supplementary material
Source: PubMed Central journal article supplement (PMC1450224)

A

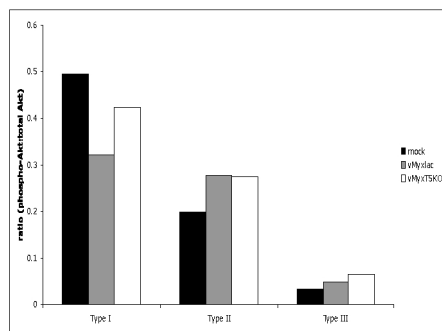

B

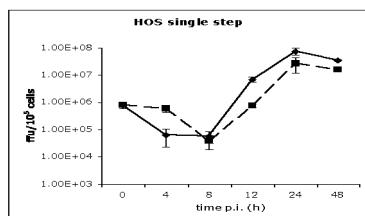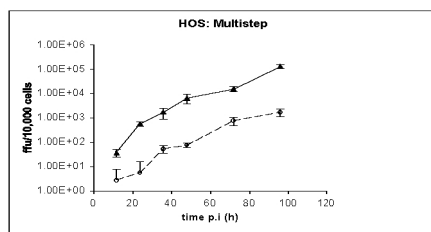

C

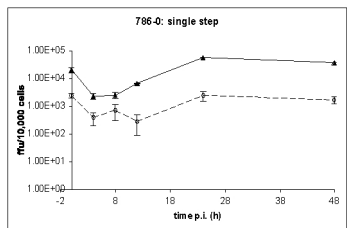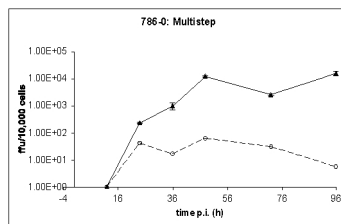

D

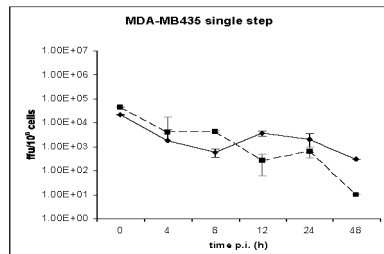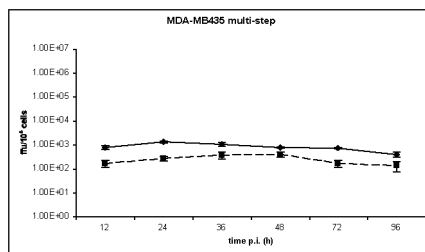

Supplement: pnas_0509341103_1.pdf [file pnas_0509341103_1.pdf]

A

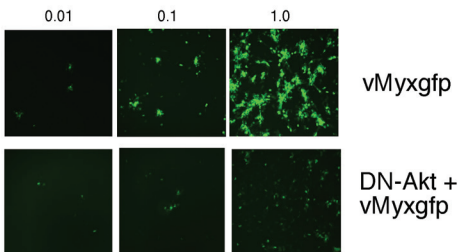

B

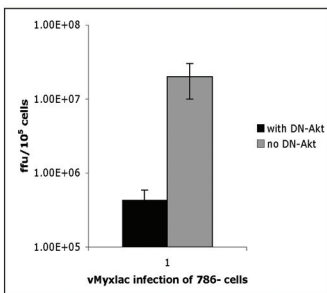

C

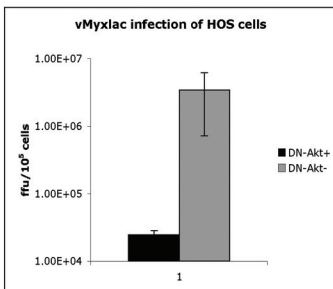

Supplement: pnas_0509341103_2.pdf [file pnas_0509341103_2.pdf]

$\alpha$ M-T7

$\alpha$ M-T5

Type I  
(HOS)

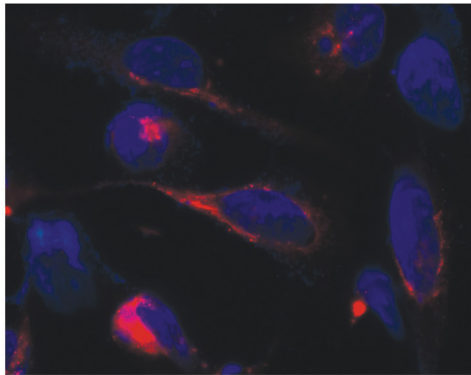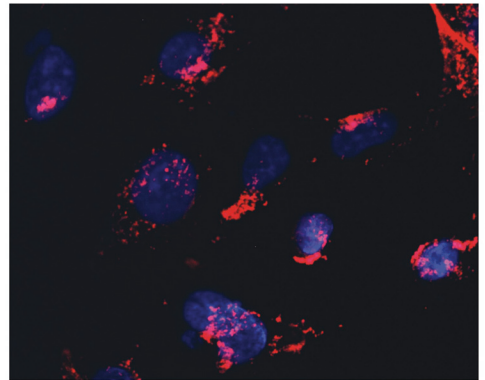

Type II  
(786-0)

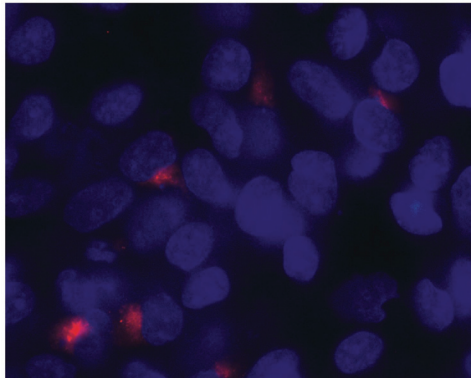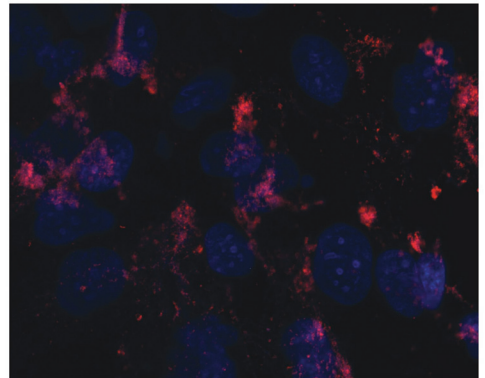

Type III  
(MDA-MB435)

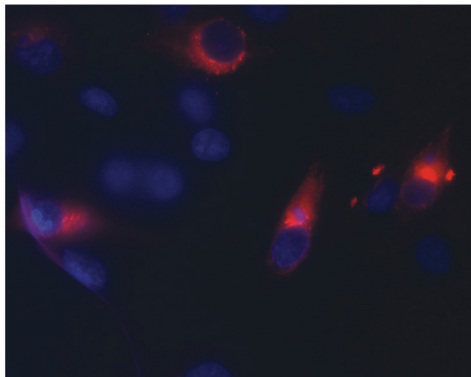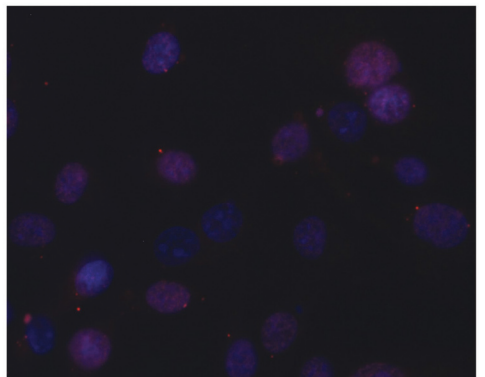

Supplement: pnas_0509341103_3.pdf [file pnas_0509341103_3.pdf]

A

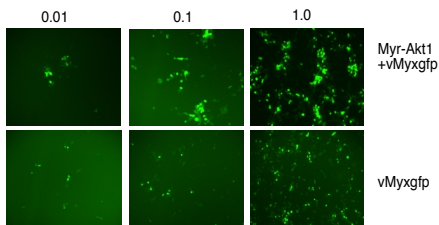

B

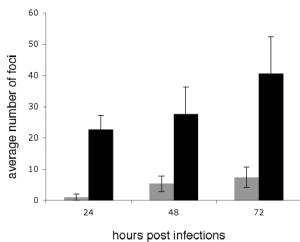

C

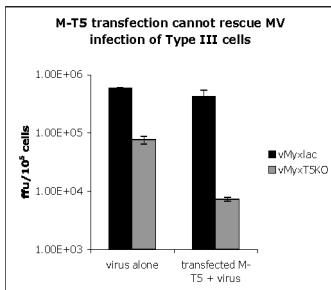

Supplement: pnas_0509341103_4.pdf [file pnas_0509341103_4.pdf]
